# Supplementary material for: Lamprey Wound Healing and Regenerative Effects: The Collaborative Efforts of Diverse Drivers
Source: MDPI journal article supplement (doi:10.3390/ijms24043213), 2023-02-06
Supplement: s1 [file s1]

**Supplementary Table S1** qPCR primer sequence

| Gene name   | F-terminal primer         | R-terminal primer         |
|-------------|---------------------------|---------------------------|
| ACTB2-like  | GGCACAGAGCAAGCGTGGTATC    | GATCTTCTCCATGTCGTCCAGTTG  |
| FAK1-like   | TCATGGTGGTGAGCAGAGACTCC   | CAACATCCAGCGGACCTACAACAG  |
| VAVA3       | GCAGGATGACTCGCAGGTGTTC    | CTCAAGCACAGGAAGTGGGACATC  |
| DOCK1-like  | TGGAGGAGCAGATACAGGAGAAGTC | GTACGAGTGAGTGGCGGAGAAATG  |
| RHOA-like   | GCTTGCCGTCCACCTCAATGTC    | ATCGTGTTTACGCAAGGACCAGTTC |
| FGF9-like   | GCGTAGTGAAGTACCGTCGAGTAAC | GCACACACATCCCTTTTGTCAATCC |
| FAK-1-like  | TCATGGTGGTGAGCAGAGACTCC   | CAACATCCAGCGGACCTACAACAG  |
| PDGFRA-like | CAGCGTCGGTCATACAGGAGTTG   | TTGCTCTTCTCGTCGTTGCCATC   |
| ITGA11-like | TCACGCAGATGGAGTCCTTCCC    | CATGAACGCCACGGTGACCTTC    |
| RRAS2       | CGGATTTGGAGGAAAGCGGATACC  | TGGAAAGGGCAAGAGGAGGAAGG   |
| ITGA8-like  | TCTGGATGTGGTCTGCCTGGTAG   | GTGTCTCTGAACTACAGCCTGGATG |
| COL2A1      | TCATCGCCGTAGTTGAAGTGTAAGC | CACAGACCATCTCCCGCAAGAAC   |
| Fgf4a-like  | ACTGTATCGACTCGGCCGTG      | CCCTTGCTGAGGCCGATGTA      |
| RAC1        | AAGCGATTAAGTGCCTGGTGGTC   | GGGAAGGCGTTTGTGGTGTAGC    |
| ARP2/3      | CATGATGATGCGGGCGGAGAAC    | CGTGTGGAAGTTGGTGATGAGGAAG |

**Supplementary Table S2** qPCR primer sequence

| Gene name     | F-terminal primer         | R-terminal primer          |
|---------------|---------------------------|----------------------------|
| BAL           | GCCAGCTTACTCGACAACCTCCTC  | ACGGTAGTTGAAGGTCACCACAATG  |
| ATGL          | CTTCTGCTGGTTCCGTGCTCTG    | GCTCTTCCTCCTCCTCCTCCTC     |
| PNLIPRP2-like | CCTACTCGGGCTACACAGAGAGG   | GGGTGGCTTTGGTGAAGAGGAG     |
| DGL           | CAAGACTGCTACGCTCACAAGGG   | TGGTAATCCTGTGCCTGCTGAAAC   |
| MGL           | CCGACAAGACGCTGCACATCTAC   | GCCACGATCCAAGCCTCAATCTC    |
| IL-17         | TGCTGGCGGTGTCTGCTTGGCTCGT | CTCTAGGTCCGGCTTGTAACGTA    |
| IL1-1-like    | CCAGGAGGGCAACGCACATC      | CGGAACAGGTCGCTGCTCTTG      |
| IL-8          | AAGCTCCTTGTCGTCCTTCTCGCC  | TTACTGCGTGGAATTTGGGTGCTCTG |
